# Supplementary material for: Resistive switching and its suppression in Pt/Nb:SrTiO3 junctions
Source: PubMed Central journal article supplement (PMC4059928; doi:10.1038/ncomms4990), 2014-06-02
Supplement: ncomms4990-s1.pdf [file ncomms4990-s1.pdf]

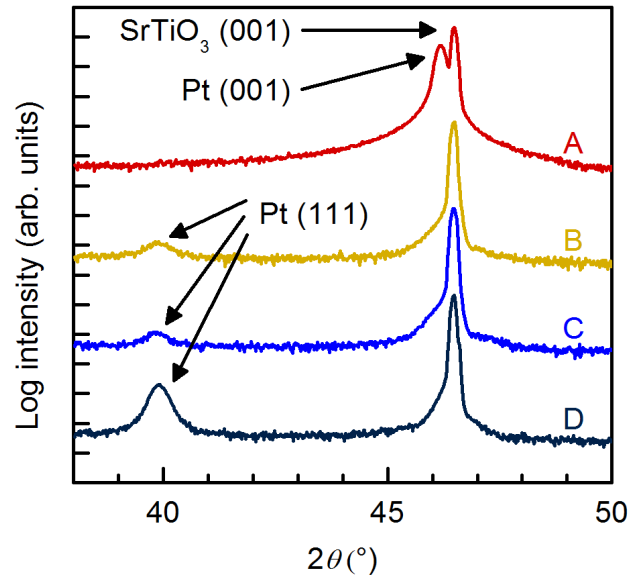

**Supplementary Figure 1:** X-ray diffraction  $2\theta$ - $\omega$  scans of all samples. Sample A, grown at 825 °C, reveals a single strong  $001_{\text{Pt}}$  peak, confirming epitaxial growth. The polycrystalline samples B, C and D show  $111_{\text{Pt}}$  peaks.

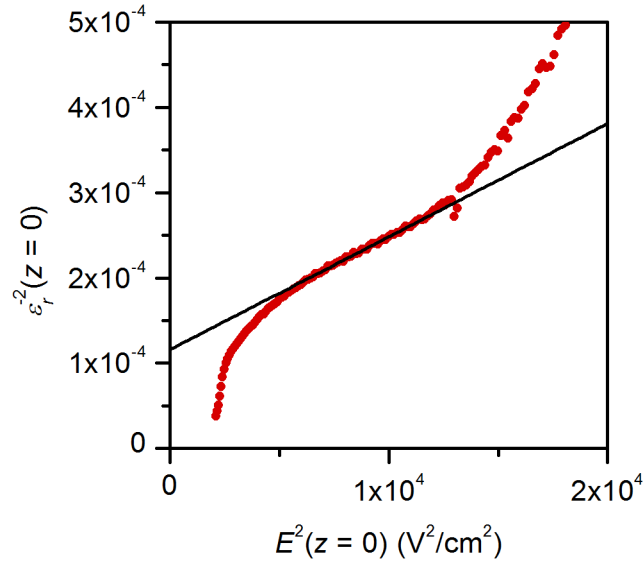

**Supplementary Figure 2:**  $\varepsilon_r^2 - E^2$  relationship at  $z = 0$  (Pt/Nb:SrTiO<sub>3</sub> interface) for sample A, obtained from the  $C$ - $V$  measurements shown in Fig. 2a, and using equations (12) and (13). The black line is a fit to Eq. (15).

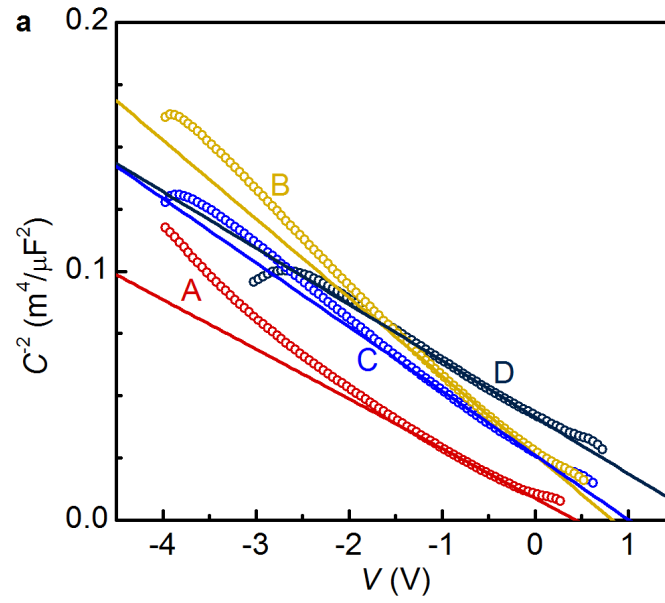

**Supplementary Figure 3:** Capacitance-voltage data for all samples in the HRS, plotted as  $C^{-2}$  vs.  $V$ . The lines are fits to a simplified model assuming a non-field dependent dielectric constant in SrTiO<sub>3</sub> [Eq. (16)].

**Supplementary Table I:** Summary of dielectric properties extracted from  $C$ - $V$  measurements.

| Sample | $C$ - $V$ (HRS)               |                             |               |                           |               |
|--------|-------------------------------|-----------------------------|---------------|---------------------------|---------------|
|        | Non-linear $\epsilon_r$ model |                             |               | Linear $\epsilon_r$ model |               |
|        | $b$ (V/cm)                    | $\epsilon_r$<br>( $E = 0$ ) | $V_{bi}$ (eV) | $\epsilon_r$              | $V_{bi}$ (eV) |
| A      | $2.75 \times 10^5$            | 92.9                        | 0.45          | 80.4                      | 0.40          |
| B      | $2.77 \times 10^5$            | 70.3                        | 0.71          | 59.0                      | 0.63          |
| C      | $2.54 \times 10^5$            | 94.4                        | 0.88          | 73.76                     | 0.74          |
| D      | $2.75 \times 10^5$            | 206.4                       | 1.51          | 106.6                     | 1.04          |

**Supplementary Table II:** Summary of Schottky barrier and state retention properties extracted from  $I$ - $V$  measurements.

| Sample | $I$ - $V$ (HRS) |               | $I$ - $V$ (LRS) |               | State retention           |         |
|--------|-----------------|---------------|-----------------|---------------|---------------------------|---------|
|        | $n$             | $\phi_B$ (eV) | $n$             | $\phi_B$ (eV) | ON/OFF ratio at $t = 0$ s | $\beta$ |
| A      | 1.19            | 0.83          | 1.39            | 0.79          | $1.8 \cdot 10^5$          | 0.23    |
| B      | 1.39            | 0.94          | 1.84            | 0.77          | 220                       | 0.35    |
| C      | 1.42            | 0.94          | 2.07            | 0.64          | 62                        | 0.34    |
| D      | 1.80            | 0.97          | 2.74            | 0.51          | 7.1                       | 0.36    |
